# Supplementary material for: The genetic variant SLC2A1-rs1105297 is associated with the differential analgesic response to a glucose-based treatment in newborns
Source: PubMed Central journal article supplement (PMC10859852; doi:10.1097/j.pain.0000000000003051), 2023-09-13
Supplement: jop-165-657-s001.pdf [file jop-165-657-s001.pdf]

**Table ST1 – SNPs characteristics**

| Gene          | SNP        | Chromosome | Position <sup>a</sup> | MM <sup>b</sup> | Mm <sup>c</sup> | mm <sup>d</sup> | MAF <sup>e</sup> | MAF TSI <sup>f</sup> | Call Rate (%) <sup>g</sup> | Type of variant <sup>h</sup> |
|---------------|------------|------------|-----------------------|-----------------|-----------------|-----------------|------------------|----------------------|----------------------------|------------------------------|
| <i>SLC2A1</i> | rs11537641 | 1          | 42930743              | GG (865)        | GA (498)        | AA (2)          | 0.18 (A)         | 0.17 (A)             | 98.13                      | Synonym variant              |
| <i>SLC2A1</i> | rs3820546  | 1          | 42932414              | AA (412)        | AG (680)        | GG (292)        | 0.48 (G)         | 0.47 (G)             | 99.50                      | Intronic variant             |
| <i>SLC2A1</i> | rs3820548  | 1          | 42932725              | GG (620)        | GA (600)        | AA (116)        | 0.31 (A)         | 0.26 (A)             | 96.05                      | Intronic variant             |
| <i>SLC2A1</i> | rs3768029  | 1          | 42933316              | CC (434)        | CT (697)        | TT (247)        | 0.43 (T)         | 0.48 (T)             | 99.07                      | Intronic variant             |
| <i>SLC2A1</i> | rs841853   | 1          | 42935767              | CC (565)        | CA (646)        | AA (163)        | 0.35 (A)         | 0.35 (A)             | 98.78                      | Intronic variant             |
| <i>SLC2A1</i> | rs841852   | 1          | 42935828              | CC (795)        | CT (449)        | TT (58)         | 0.22 (T)         | 0.19 (T)             | 93.60                      | Intronic variant             |
| <i>SLC2A1</i> | rs841847   | 1          | 42937037              | CC (697)        | CT (576)        | TT (113)        | 0.29 (T)         | 0.25 (T)             | 99.64                      | Intronic variant             |
| <i>SLC2A1</i> | rs1105297  | 1          | 42945925              | GG (559)        | GA (624)        | AA (197)        | 0.37 (A)         | 0.33 (A)             | 99.21                      | Intronic variant             |
| <i>SLC2A1</i> | rs710222   | 1          | 42947982              | AA (404)        | AG (683)        | GG (293)        | 0.46 (G)         | 0.41 (G)             | 99.21                      | Intronic variant             |
| <i>SLC2A1</i> | rs7522674  | 1          | 42951110              | CC (832)        | CT (447)        | TT (56)         | 0.21 (T)         | 0.17 (T)             | 95.97                      | Intronic variant             |
| <i>SLC2A1</i> | rs7519412  | 1          | 42967799              | GG (659)        | GA (598)        | AA (125)        | 0.31 (A)         | 0.26 (A)             | 99.35                      | Intronic variant             |
| <i>SLC2A1</i> | rs841858   | 1          | 42933496              | GG (915)        | GT (418)        | TT (43)         | 0.18 (T)         | 0.16 (T)             | 98.92                      | Intronic variant             |
| <i>SLC2A1</i> | rs710216   | 1          | 42963086              | AA (853)        | AG (466)        | GG (65)         | 0.22 (G)         | 0.20 (G)             | 99.50                      | Intronic variant             |
| <i>SLC2A1</i> | rs11210769 | 1          | 42963672              | CC (1083)       | CT (255)        | TT (13)         | 0.10 (T)         | 0.10 (T)             | 97.12                      | Intronic variant             |
| <i>SLC2A2</i> | rs5398     | 3          | 170998041             | GG (625)        | GA (619)        | AA (134)        | 0.32 (A)         | 0.31 (A)             | 99.07                      | Missense variant             |
| <i>SLC2A2</i> | rs11924648 | 3          | 171000207             | AA (966)        | AG (382)        | GG (42)         | 0.17 (G)         | 0.16 (G)             | 99.93                      | Intronic variant             |
| <i>SLC2A2</i> | rs28720688 | 3          | 171011340             | AA (1008)       | AG (350)        | GG (29)         | 0.15 (G)         | 0.15 (G)             | 99.71                      | Intronic variant             |
| <i>SLC6A2</i> | rs747107   | 16         | 55661809              | CC (943)        | CT (389)        | TT (41)         | 0.17 (T)         | 0.11 (T)             | 98.71                      | Intronic variant             |
| <i>SLC6A2</i> | rs40519    | 16         | 55664156              | GG (974)        | GC (359)        | CC (32)         | 0.15 (C)         | 0.17 (C)             | 98.13                      | Intronic variant             |
| <i>SLC6A2</i> | rs40434    | 16         | 55665613              | AA (512)        | AG (667)        | GG (204)        | 0.39 (G)         | 0.44 (G)             | 99.42                      | Intronic variant             |
| <i>SLC6A2</i> | rs36026    | 16         | 55670883              | CC (1055)       | CA (297)        | AA (23)         | 0.13 (A)         | 0.14 (A)             | 98.85                      | Intronic variant             |
| <i>SLC6A2</i> | rs62028846 | 16         | 55678618              | CC (984)        | CT (370)        | TT (33)         | 0.16 (T)         | 0.13 (T)             | 99.71                      | Intronic variant             |

| Gene          | SNP        | Chromosome | Position <sup>a</sup> | MM <sup>b</sup> | Mm <sup>c</sup> | mm <sup>d</sup> | MAF <sup>e</sup> | MAF TSI <sup>f</sup> | Call Rate (%) <sup>g</sup> | Type of variant <sup>h</sup> |
|---------------|------------|------------|-----------------------|-----------------|-----------------|-----------------|------------------|----------------------|----------------------------|------------------------------|
| <i>SLC6A2</i> | rs1814269  | 16         | 55683116              | GG (423)        | GA (680)        | AA (286)        | 0.45 (A)         | 0.46 (A)             | 99.86                      | Intronic variant             |
| <i>SLC6A2</i> | rs13330300 | 16         | 55684686              | GG (936)        | GA (396)        | AA (56)         | 0.18 (A)         | 0.14 (A)             | 99.78                      | Intronic variant             |
| <i>SLC6A2</i> | rs9939709  | 16         | 55690921              | GG (994)        | GT (354)        | TT (33)         | 0.15 (T)         | 0.12 (T)             | 99.28                      | Intronic variant             |
| <i>SLC6A2</i> | rs1566652  | 16         | 55695212              | GG (482)        | GT (667)        | TT (233)        | 0.41 (T)         | 0.43 (T)             | 99.35                      | Intronic variant             |
| <i>SLC6A2</i> | rs1800887  | 16         | 55699677              | TT (848)        | TC (453)        | CC (83)         | 0.22 (C)         | 0.17 (C)             | 99.50                      | Intronic variant             |
| <i>SLC6A2</i> | rs6499773  | 16         | 55705094              | TT (946)        | TA (389)        | AA (39)         | 0.17 (A)         | 0.13 (A)             | 98.78                      | 3' UTR                       |
| <i>SLC6A2</i> | rs12923720 | 16         | 55658891              | CC (1208)       | CT (173)        | TT (3)          | 0.07 (T)         | 0.07 (T)             | 99.50                      | Intronic variant             |
| <i>SLC6A2</i> | rs1532701  | 16         | 55664115              | AA (457)        | AG (670)        | GG (256)        | 0.43 (G)         | 0.38 (G)             | 99.42                      | Intronic variant             |
| <i>SLC6A2</i> | rs28618083 | 16         | 55664751              | TT (571)        | TC (628)        | CC (186)        | 0.36 (C)         | 0.30 (C)             | 99.57                      | Intronic variant             |
| <i>SLC6A2</i> | rs187715   | 16         | 55670130              | TT (1257)       | TC (127)        | CC (3)          | 0.05 (C)         | 0.06 (C)             | 99.71                      | Intronic variant             |
| <i>SLC6A2</i> | rs16955591 | 16         | 55679874              | CC (1026)       | CT (340)        | TT (22)         | 0.14 (T)         | 0.10 (T)             | 99.78                      | Intronic variant             |
| <i>SLC6A2</i> | rs12446977 | 16         | 55684677              | AA (650)        | AG (578)        | GG (156)        | 0.32 (G)         | 0.36 (G)             | 99.50                      | Intronic variant             |
| <i>SLC6A2</i> | rs2279805  | 16         | 55695212              | CC (374)        | CT (664)        | TT (325)        | 0.48 (T)         | 0.47 (T)             | 97.99                      | Intronic variant             |
| <i>SLC6A2</i> | rs36007    | 16         | 55701626              | CC (1162)       | CT (165)        | TT (9)          | 0.07 (T)         | 0.06 (T)             | 96.05                      | Intronic variant             |

<sup>a</sup> Position in base-pairs (GRCh38.p13); <sup>b</sup> homozygous subjects for the major allele; <sup>c</sup> heterozygous subjects; <sup>d</sup> homozygous subjects for the minor allele; <sup>e</sup> minor allele frequency calculated within our dataset; <sup>f</sup> minor allele frequency according to 1000 Genomes for the TSI population; <sup>g</sup> Genotyping call rate; <sup>h</sup> functional consequence of the variant within the gene region.

**Table ST2** – Association between SNPs and response to the therapy (logistic regression 1)

| SNP                       | EA | NEA | Allelic model    |         | Dominant model     |         |
|---------------------------|----|-----|------------------|---------|--------------------|---------|
|                           |    |     | OR (95% CI)      | p-value | OR (95% CI)        | p-value |
| <i>SLC2A1</i> -rs1105297  | G  | A   | 1.38 (1.03-1.87) | 0.036   | 1.47 (0.98-2.20)   | 0.063   |
| <i>SLC2A1</i> -rs11210769 | C  | T   | 1.85 (1.10-3.32) | 0.028   | 1.82 (1.05 - 3.32) | 0.039   |
| <i>SLC2A1</i> -rs11537641 | G  | A   | 1.77 (1.15-2.78) | 0.012   | 1.76 (1.14-2.78)   | 0.012   |
| <i>SLC2A1</i> -rs3768029  | G  | A   | 1.25 (0.94-1.68) | 0.127   | 1.38 (0.88-2.20)   | 0.168   |
| <i>SLC2A1</i> -rs3820546  | G  | A   | 1.33 (1.00-1.77) | 0.047   | 1.67 (1.05-2.74)   | 0.036   |
| <i>SLC2A1</i> -rs3820548  | G  | A   | 1.52 (1.10-2.13) | 0.013   | 1.53 (1.01-2.30)   | 0.043   |
| <i>SLC2A1</i> -rs710216   | A  | G   | 1.19 (0.78-1.35) | 0.326   | 1.28 (0.84-1.93)   | 0.249   |
| <i>SLC2A1</i> -rs710222   | A  | G   | 1.02 (0.78-1.35) | 0.873   | 1.09 (0.71-1.68)   | 0.689   |
| <i>SLC2A1</i> -rs7519412  | T  | G   | 0.91 (0.65-1.24) | 0.545   | 0.84 (0.56-1.26)   | 0.393   |
| <i>SLC2A1</i> -rs7522674  | T  | C   | 1.11 (0.77-1.57) | 0.574   | 1.01 (0.66-1.54)   | 0.959   |
| <i>SLC2A1</i> -rs841847   | C  | T   | 1.13 (0.81-1.55) | 0.464   | 1.33 (0.88-2.00)   | 0.175   |
| <i>SLC2A1</i> -rs841852   | A  | G   | 1.04 (0.72-1.49) | 0.824   | 0.95 (0.62-1.46)   | 0.826   |
| <i>SLC2A1</i> -rs841853   | C  | T   | 1.03 (0.75-1.40) | 0.855   | 1.06 (0.71-1.62)   | 0.774   |
| <i>SLC2A1</i> -rs841858   | T  | C   | 0.83 (0.56-1.20) | 0.328   | 0.78 (0.50-1.19)   | 0.252   |
| <i>SLC2A2</i> -rs11924648 | C  | T   | 1.01 (0.69-1.45) | 0.960   | 1.09 (0.71-1.67)   | 0.685   |
| <i>SLC2A2</i> -rs28720688 | G  | A   | 0.90 (0.57-1.38) | 0.632   | 0.95 (0.59-1.50)   | 0.842   |
| <i>SLC2A2</i> -rs5398     | T  | C   | 0.91 (0.66-1.25) | 0.562   | 0.92 (0.61-1.39)   | 0.691   |
| <i>SLC6A2</i> -rs12446977 | A  | C   | 1.35 (1.01-1.80) | 0.041   | 1.58 (1.05-2.38)   | 0.029   |
| <i>SLC6A2</i> -rs12923720 | T  | C   | 0.67 (0.33-1.23) | 0.226   | 0.67 (0.33-1.26)   | 0.245   |
| <i>SLC6A2</i> -rs13330300 | G  | A   | 1.41 (0.96-2.15) | 0.094   | 1.42 (0.90-2.29)   | 0.143   |
| <i>SLC6A2</i> -rs1532701  | A  | G   | 0.78 (0.58-1.04) | 0.090   | 0.67 (0.44-1.02)   | 0.056   |
| <i>SLC6A2</i> -rs1566652  | G  | A   | 1.09 (0.81-1.45) | 0.571   | 1.26 (0.82-1.98)   | 0.299   |
| <i>SLC6A2</i> -rs16955591 | G  | C   | 1.03 (0.67-1.54) | 0.889   | 1.02 (0.64-1.58)   | 0.945   |
| <i>SLC6A2</i> -rs1800887  | A  | G   | 1.20 (0.85-1.72) | 0.323   | 1.16 (0.56-1.31)   | 0.493   |
| <i>SLC6A2</i> -rs1814269  | T  | C   | 0.94 (0.71-1.24) | 0.651   | 0.95 (0.62-1.48)   | 0.822   |
| <i>SLC6A2</i> -rs187715   | T  | A   | 0.83 (0.40-1.54) | 0.571   | 0.77 (0.35-1.52)   | 0.473   |
| <i>SLC6A2</i> -rs2279805  | G  | A   | 1.16 (0.88-1.53) | 0.296   | 1.54 (0.97-2.51)   | 0.072   |
| <i>SLC6A2</i> -rs28618083 | G  | A   | 0.88 (0.65-1.17) | 0.372   | 0.85 (0.57-1.28)   | 0.443   |
| <i>SLC6A2</i> -rs36007    | C  | T   | 0.90 (0.48-1.58) | 0.736   | 0.94 (0.49-1.70)   | 0.848   |

| SNP                       | EA | NEA | Allelic model    |         | Dominant model   |         |
|---------------------------|----|-----|------------------|---------|------------------|---------|
|                           |    |     | OR (95% CI)      | p-value | OR (95% CI)      | p-value |
| <i>SLC6A2</i> -rs36026    | A  | G   | 1.11 (0.71-1.68) | 0.644   | 1.00 (0.61-1.60) | 0.997   |
| <i>SLC6A2</i> -rs40434    | T  | C   | 1.30 (0.97-1.75) | 0.075   | 1.24 (0.81-1.91) | 0.326   |
| <i>SLC6A2</i> -rs40519    | T  | C   | 1.00 (0.66-1.48) | 0.997   | 0.93 (0.59-1.45) | 0.753   |
| <i>SLC6A2</i> -rs62028846 | T  | C   | 1.03 (0.69-1.52) | 0.876   | 1.00 (0.64-1.53) | 0.998   |
| <i>SLC6A2</i> -rs6499773  | A  | C   | 0.86 (0.58-1.26) | 0.461   | 0.84 (0.53-1.31) | 0.450   |
| <i>SLC6A2</i> -rs747107   | T  | G   | 0.84 (0.56-1.24) | 0.400   | 0.84 (0.53-1.30) | 0.439   |
| <i>SLC6A2</i> -rs9939709  | T  | G   | 0.76 (0.49-1.16) | 0.221   | 0.76 (0.46-1.22) | 0.274   |

The table reports the results of the association analysis of the logistic regression model comparing non-responding newborns (ABC score > 0) with newborns responding to the therapy (ABC score = 0).

a – Effect allele (allele affecting the risk of not responding to the therapy compared to the non-effect allele); b – Non-effect allele (allele considered as baseline).

**Table ST3** – Association between SNPs and response to the therapy (logistic regression 2)

| SNP                       | EA <sup>a</sup> | NEA <sup>b</sup> | Allelic model     |                       | Dominant model    |                       |
|---------------------------|-----------------|------------------|-------------------|-----------------------|-------------------|-----------------------|
|                           |                 |                  | OR (95% CI)       | p-value               | OR (95% CI)       | p-value               |
| <i>SLC2A1</i> -rs1105297  | G               | A                | 3.98 (1.95-9.17)  | 4.05x10 <sup>-4</sup> | 4.18 (1.88-10.10) | 7.17x10 <sup>-4</sup> |
| <i>SLC2A1</i> -rs11210769 | C               | T                | 4.69 (1.30-33.33) | 0.050                 | 4.85 (1.30-34.48) | 0.048                 |
| <i>SLC2A1</i> -rs11537641 | G               | A                | 3.15 (1.26-9.62)  | 0.024                 | 3.15 (1.26-9.62)  | 0.024                 |
| <i>SLC2A1</i> -rs3768029  | G               | A                | 1.62 (0.95-2.82)  | 0.081                 | 1.83 (0.77-5.10)  | 0.203                 |
| <i>SLC2A1</i> -rs3820546  | G               | A                | 1.27 (0.75-2.17)  | 0.377                 | 1.93 (0.80-5.52)  | 0.174                 |
| <i>SLC2A1</i> -rs3820548  | G               | A                | 1.31 (0.73-2.46)  | 0.381                 | 1.32 (0.60-2.85)  | 0.484                 |
| <i>SLC2A1</i> -rs710216   | A               | G                | 2.99 (1.23-7.27)  | 0.016                 | 3.06 (1.21-7.73)  | 0.018                 |
| <i>SLC2A1</i> -rs710222   | A               | G                | 1.66 (0.97-2.84)  | 0.065                 | 2.54 (1.19-5.42)  | 0.016                 |
| <i>SLC2A1</i> -rs7519412  | T               | G                | 0.75 (0.39-1.37)  | 0.371                 | 0.70 (0.32-1.50)  | 0.361                 |
| <i>SLC2A1</i> -rs7522674  | T               | C                | 1.08 (0.54-2.06)  | 0.813                 | 0.95 (0.42-2.04)  | 0.897                 |
| <i>SLC2A1</i> -rs841847   | C               | T                | 1.19 (0.63-2.18)  | 0.587                 | 1.46 (0.68-3.18)  | 0.332                 |
| <i>SLC2A1</i> -rs841852   | A               | G                | 0.77 (0.35-1.54)  | 0.485                 | 0.72 (0.29-1.63)  | 0.444                 |
| <i>SLC2A1</i> -rs841853   | C               | T                | 0.94 (0.50-1.72)  | 0.848                 | 1.00 (0.46-2.22)  | 0.992                 |
| <i>SLC2A1</i> -rs841858   | T               | C                | 0.45 (0.17-1.02)  | 0.078                 | 0.45 (0.16-1.08)  | 0.094                 |
| <i>SLC2A2</i> -rs11924648 | C               | T                | 1.19 (0.60-2.20)  | 0.600                 | 1.36 (0.60-2.94)  | 0.443                 |
| <i>SLC2A2</i> -rs28720688 | G               | A                | 1.31 (0.59-2.66)  | 0.481                 | 1.48 (0.64-3.28)  | 0.341                 |
| <i>SLC2A2</i> -rs5398     | T               | C                | 1.14 (0.64-1.99)  | 0.642                 | 1.10 (0.52-2.37)  | 0.806                 |
| <i>SLC6A2</i> -rs12446977 | A               | C                | 1.96 (1.16-3.33)  | 0.012                 | 2.76 (1.25-6.61)  | 0.016                 |
| <i>SLC6A2</i> -rs12923720 | T               | C                | 0.84 (0.24-2.24)  | 0.755                 | 0.87 (0.24-2.40)  | 0.800                 |
| <i>SLC6A2</i> -rs13330300 | G               | A                | 3.28 (1.31-11.11) | 0.025                 | 3.42 (1.28-12.05) | 0.027                 |
| <i>SLC6A2</i> -rs1532701  | A               | G                | 0.76 (0.44-1.31)  | 0.334                 | 0.76 (0.36-1.68)  | 0.485                 |

| SNP                       | EA <sup>a</sup> | NEA <sup>b</sup> | Allelic model    |         | Dominant model   |         |
|---------------------------|-----------------|------------------|------------------|---------|------------------|---------|
|                           |                 |                  | OR (95% CI)      | p-value | OR (95% CI)      | p-value |
| <i>SLC6A2</i> -rs1566652  | G               | A                | 0.98 (0.56-1.69) | 0.949   | 1.11 (0.51-2.60) | 0.799   |
| <i>SLC6A2</i> -rs16955591 | G               | C                | 0.54 (0.18-1.29) | 0.210   | 0.55 (0.18-1.39) | 0.240   |
| <i>SLC6A2</i> -rs1800887  | A               | G                | 0.46 (0.19-0.95) | 0.057   | 0.38 (0.14-0.90) | 0.039   |
| <i>SLC6A2</i> -rs1814269  | T               | C                | 0.86 (0.49-1.47) | 0.577   | 0.81 (0.37-1.84) | 0.595   |
| <i>SLC6A2</i> -rs187715   | T               | A                | 0.28 (0.02-1.32) | 0.216   | 0.28 (0.02-1.38) | 0.215   |
| <i>SLC6A2</i> -rs2279805  | G               | A                | 1.26 (0.75-2.12) | 0.388   | 1.55 (0.67-4.06) | 0.330   |
| <i>SLC6A2</i> -rs28618083 | G               | A                | 0.80 (0.45-1.38) | 0.438   | 0.80 (0.38-1.71) | 0.564   |
| <i>SLC6A2</i> -rs36007    | C               | T                | 0.70 (0.16-2.08) | 0.569   | 0.70 (0.16-2.14) | 0.582   |
| <i>SLC6A2</i> -rs36026    | A               | G                | 0.71 (0.26-1.63) | 0.457   | 0.58 (0.19-1.46) | 0.281   |
| <i>SLC6A2</i> -rs40434    | T               | C                | 1.77 (1.02-3.13) | 0.045   | 2.13 (0.91-5.67) | 0.101   |
| <i>SLC6A2</i> -rs40519    | T               | C                | 0.44 (0.15-1.07) | 0.098   | 0.44 (0.14-1.10) | 0.106   |
| <i>SLC6A2</i> -rs62028846 | T               | C                | 0.61 (0.23-1.38) | 0.271   | 0.62 (0.23-1.46) | 0.302   |
| <i>SLC6A2</i> -rs6499773  | A               | C                | 0.48 (0.18-1.05) | 0.097   | 0.39 (0.13-0.97) | 0.062   |
| <i>SLC6A2</i> -rs747107   | T               | G                | 1.17 (0.56-2.24) | 0.662   | 1.22 (0.53-2.69) | 0.627   |
| <i>SLC6A2</i> -rs9939709  | T               | G                | 0.37 (0.11-0.92) | 0.060   | 0.36 (0.10-0.98) | 0.069   |

The table reports the results of the association analysis of the logistic regression model comparing non-responding newborns with a high ABC score (ABC score > 4) with newborns responding to the therapy (ABC score = 0).

a – Effect allele (allele affecting the risk of not responding to the therapy compared to the non-effect allele); b – Non-effect allele (allele considered as baseline).

**Table ST4** – Association between SNPs and response to the therapy (ordered logistic regression)

| SNP                       | EA <sup>a</sup> | NEA <sup>b</sup> | Allelic model    |         | Dominant model     |         |
|---------------------------|-----------------|------------------|------------------|---------|--------------------|---------|
|                           |                 |                  | OR (95% CI)      | p-value | OR (95% CI)        | p-value |
| <i>SLC2A1</i> -rs1105297  | G               | A                | 1.40 (1.04-1.89) | 0.026   | 1.51 (1.01-2.25)   | 0.045   |
| <i>SLC2A1</i> -rs11210769 | C               | T                | 1.83 (1.06-3.13) | 0.029   | 1.81 (1.03-3.17)   | 0.029   |
| <i>SLC2A1</i> -rs11537641 | G               | A                | 1.78 (1.15-2.78) | 0.009   | 1.78 (1.15-2.75)   | 0.013   |
| <i>SLC2A1</i> -rs3768029  | G               | A                | 1.28 (0.96-1.71) | 0.093   | 1.42 (0.90-2.23)   | 0.686   |
| <i>SLC2A1</i> -rs3820546  | G               | A                | 1.32 (0.99-1.32) | 0.052   | 1.69 (1.05-2.73)   | 0.024   |
| <i>SLC2A1</i> -rs3820548  | G               | A                | 0.67 (0.48-0.92) | 0.015   | 0.67 (0.44-1.00)   | 0.049   |
| <i>SLC2A1</i> -rs710216   | A               | G                | 1.22 (0.87-1.73) | 0.248   | 1.31 (0.87-1.98)   | 0.143   |
| <i>SLC2A1</i> -rs710222   | A               | G                | 1.01 (0.77-1.33) | 0.922   | 1.15 (0.57-1.34)   | 0.075   |
| <i>SLC2A1</i> -rs7519412  | T               | G                | 0.90 (0.65-1.23) | 0.507   | 0.84 (0.56-1.26)   | 0.376   |
| <i>SLC2A1</i> -rs7522674  | T               | C                | 1.09 (0.77-1.55) | 0.627   | 1.00 (0.66-1.53)   | 0.889   |
| <i>SLC2A1</i> -rs841847   | C               | T                | 1.12 (0.82-1.55) | 0.472   | 1.34 (0.89-2.01)   | 0.455   |
| <i>SLC2A1</i> -rs841852   | A               | G                | 1.01 (0.71-1.45) | 0.945   | 0.93 (0.61-1.43)   | 0.913   |
| <i>SLC2A1</i> -rs841853   | C               | T                | 1.02 (0.75-1.39) | 0.89    | 1.07 (0.71-1.62)   | 0.374   |
| <i>SLC2A1</i> -rs841858   | T               | C                | 0.81 (0.56-1.18) | 0.276   | 0.76 (0.50-1.70)   | 0.065   |
| <i>SLC2A2</i> -rs11924648 | C               | T                | 1.01 (0.69-1.46) | 0.973   | 1.09 (0.71-1.67)   | 0.473   |
| <i>SLC2A2</i> -rs28720688 | G               | A                | 0.92 (0.59-1.42) | 0.702   | 0.98 (0.62-1.55)   | 0.927   |
| <i>SLC2A2</i> -rs5398     | T               | C                | 0.91 (0.66-1.26) | 0.569   | 0.92 (0.62-1.38)   | 0.811   |
| <i>SLC6A2</i> -rs12446977 | A               | C                | 1.37 (1.03-1.82) | 0.031   | 1.60 (1.07-2.40)   | 0.906   |
| <i>SLC6A2</i> -rs12923720 | T               | C                | 0.67 (0.35-1.29) | 0.232   | 0.68 (0.35-1.32)   | 0.132   |
| <i>SLC6A2</i> -rs13330300 | G               | A                | 1.41 (0.93-2.08) | 0.099   | 1.42 (0.89 – 2.26) | 0.031   |
| <i>SLC6A2</i> -rs1532701  | A               | G                | 0.79 (0.60-1.05) | 0.106   | 0.69 (0.46-1.04)   | 0.049   |

| SNP                       | EA <sup>a</sup> | NEA <sup>b</sup> | Allelic model    |         | Dominant model   |         |
|---------------------------|-----------------|------------------|------------------|---------|------------------|---------|
|                           |                 |                  | OR (95% CI)      | p-value | OR (95% CI)      | p-value |
| <i>SLC6A2</i> -rs1566652  | G               | A                | 1.06 (0.80-1.41) | 0.686   | 1.22 (0.79-1.88) | 0.283   |
| <i>SLC6A2</i> -rs16955591 | G               | C                | 0.99 (0.66-1.48) | 0.948   | 0.97 (0.62-1.51) | 0.647   |
| <i>SLC6A2</i> -rs1800887  | A               | G                | 0.84 (0.59-1.19) | 0.322   | 0.85 (0.56-1.30) | 0.700   |
| <i>SLC6A2</i> -rs1814269  | T               | C                | 0.92 (0.69-1.22) | 0.558   | 0.91 (0.59-1.40) | 0.887   |
| <i>SLC6A2</i> -rs187715   | T               | A                | 0.77 (0.40-1.49) | 0.446   | 0.72 (0.35-1.48) | 0.425   |
| <i>SLC6A2</i> -rs2279805  | G               | A                | 1.18 (0.89-1.55) | 0.249   | 1.56 (0.97-2.49) | 0.192   |
| <i>SLC6A2</i> -rs28618083 | G               | A                | 0.88 (0.66-1.18) | 0.392   | 0.86 (0.58-1.29) | 0.532   |
| <i>SLC6A2</i> -rs36007    | C               | T                | 0.89 (0.50-1.61) | 0.706   | 0.93 (0.50-1.71) | 0.552   |
| <i>SLC6A2</i> -rs36026    | A               | G                | 1.06 (0.70-1.61) | 0.784   | 0.97 (0.61-1.56) | 0.396   |
| <i>SLC6A2</i> -rs40434    | T               | C                | 1.32 (0.99-1.77) | 0.060   | 1.26 (0.83-1.92) | 0.987   |
| <i>SLC6A2</i> -rs40519    | T               | C                | 0.96 (0.65-1.42) | 0.838   | 0.90 (0.58-1.41) | 0.156   |
| <i>SLC6A2</i> -rs62028846 | T               | C                | 1.00 (0.68-1.48) | 0.990   | 0.97 (0.63-1.49) | 0.739   |
| <i>SLC6A2</i> -rs6499773  | A               | C                | 0.86 (0.58-1.27) | 0.446   | 0.84 (0.54-1.30) | 0.734   |
| <i>SLC6A2</i> -rs747107   | T               | G                | 0.87 (0.59-1.29) | 0.492   | 0.88 (0.56-1.36) | 0.214   |
| <i>SLC6A2</i> -rs9939709  | T               | G                | 0.76 (0.50-1.17) | 0.219   | 0.76 (0.47-1.24) | 0.275   |

The table reports the results of the association analysis of the ordered logistic regression model comparing newborns within each ABC score category with those within the next category, under the proportional odds assumption.

a – Effect allele (allele affecting the risk of not responding to the therapy compared to the non-effect allele); b – Non-effect allele (allele considered as baseline).



**Table ST5** – Functional characterization of the SNPs

| SNP        | Gene          | GTEx                                   |                            | RegulomeDB        |                    |                               | HaploReg                      | CADD             |
|------------|---------------|----------------------------------------|----------------------------|-------------------|--------------------|-------------------------------|-------------------------------|------------------|
|            |               | eQTL – Target gene <sup>a</sup>        | eQTL – Tissue <sup>b</sup> | rank <sup>c</sup> | score <sup>d</sup> | Chromatine state <sup>e</sup> | Chromatine state <sup>f</sup> | CADD PHRED score |
| rs1105297  | <i>SLC2A1</i> | <i>SLC2A1-AS1</i><br><i>SLC2A1-AS1</i> | Caudate nucleus<br>Putamen | 5                 | 1                  | Enhancer activity             | Enhancer activity             | 0.261            |
| rs11210769 | <i>SLC2A1</i> | -                                      | -                          | 2b                | 0.8                | Enhancer activity             | Enhancer activity             | 5.537            |
| rs11537641 | <i>SLC2A1</i> | -                                      | -                          | 4                 | 0.61               | Strong transcription          | Enhancer activity             | 29.50            |
| rs12446977 | <i>SLC6A2</i> | -                                      | -                          | 5                 | 0.59               | Quiescent/Low activity        | -                             | 2.341            |

The table reports the functional characterization of the most relevant SNPs.

<sup>a</sup> – It indicates the gene whose expression is altered by the SNP in the first column.

<sup>b</sup> - It indicates the tissue in which the SNP (first column) affects the expression of the target gene (third column). For simplicity purposes, only the eQTL data in brain structures relevant for this study are reported.

<sup>c</sup> – The rank indicates a category based on experimental data supporting a functional activity of the SNP.

<sup>d</sup> – The score indicates a probability for the SNP to be a regulatory variant.

<sup>e</sup> - It indicates the chromatinic state basing on RegulomeDB data.

<sup>f</sup> - It indicates the chromatinic state according to HaploReg database.
